# Supplementary material
Source: publisher figshare collection journal article supplement (https://acs.figshare.com/ndownloader/files/27039754)
Supplement: Supplementary file 1 [file 27039754]

**Supporting information**

**Should the tubular photocatalytic reactors work continuously or in  
an intermittent manner instead?**

*Zilong Zeng, Lijun Sun, Heng Liu, Benchu Ma, Dengwei Jing\*, Liejin Guo*

*International Research Center for Renewable Energy, State Key Laboratory of  
Multiphase Flow in Power Engineering,  
<sup>1</sup>Xi'an Jiaotong University Xi'an, Shaanxi, 710049, PR China*

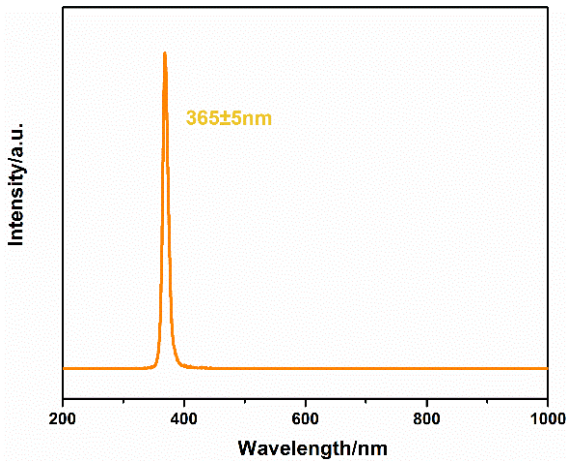

**Fig.S1** The irradiation characteristic of LED light source.

**Table.S1** The main parameters of photocatalytic reactor.

|                                              |      |
|----------------------------------------------|------|
| Diameter of glass window (mm)                | 12   |
| Inner diameter of reaction cavity (mm)       | 10   |
| High of reaction cavity (mm)                 | 20   |
| Diameter of liquid inlet tube (mm)           | 1    |
| Diameter of liquid outlet tube (mm)          | 1    |
| Inner diameter of outer circulated tube (mm) | 3    |
| Volume of reaction cavity (mL)               | 1.57 |

Corresponding author: [dwjing@mail.xjtu.edu.cn](mailto:dwjing@mail.xjtu.edu.cn).

Flow mechanism intermittent  
International Research Center for Renewable Energy, State Key Laboratory of Multiphase Flow in Power Engineering, Xi'an Jiaotong University Xi'an, Shaanxi, 710049, PR China

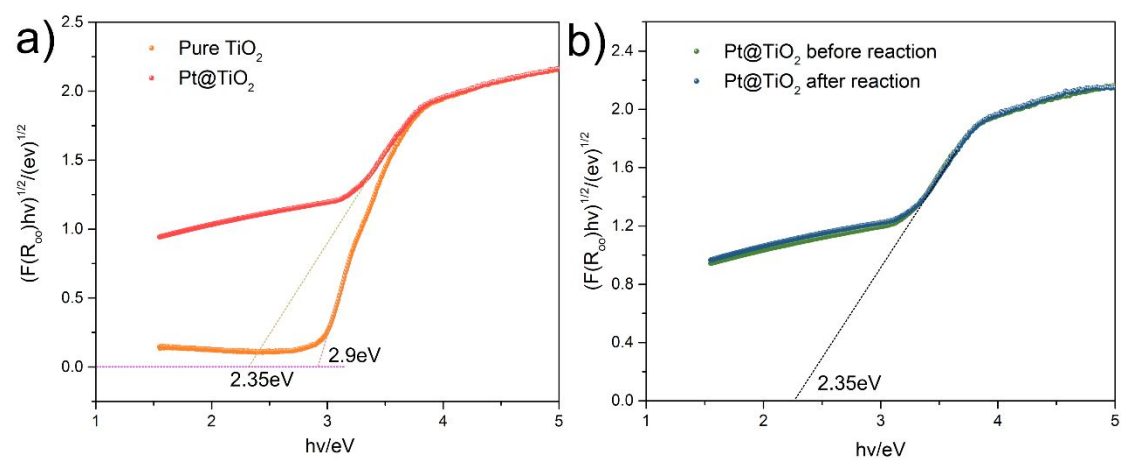

**Fig.S2** a) Band gaps of pure TiO<sub>2</sub> and Pt@TiO<sub>2</sub> calculated by Kubelka-Munk (K-M) equation; b) Band gaps of Pt@TiO<sub>2</sub> before and after reaction.
